# Supplementary material for: Predicting Mental Health Trajectories After Potentially Traumatic Events: A Machine Learning Approach
Source: Research Square preprint supplement (doi:10.21203/rs.3.rs-7048562/v1), 2025-07-18
Supplement: Supplementary file 1 [file 9b23b103235a4d958c8a164e.docx]

**Supplementary 1**

Fit indices, entropies, and percentage of class members for latent growth mixture models

| Internalizing problems | | | | | | |
| --- | --- | --- | --- | --- | --- | --- |
| Number of classes | AIC | BIC | SABIC | LMR-LRT, p-value | Entropy | Percentage: class1/2/3/4/5 |
| 1 | 101009.76 | 101047.73 | 101028.67 |  | 1.000 | 100.0 |
| 2 | 98944.11 | 99007.40 | 98975.63 | < .001 | .64 | 60.9/39.1 |
| 3 | 98532.78 | 98621.38 | 98576.89 | < .001 | .67 | 11.9/50.8/37.3 |
| 4 | 98466.62 | 98580.54 | 98523.34 | < .001 | .63 | 6.9/46.9/17.7/28.5 |
| 5 | 98474.63 | 98613.86 | 98543.95 | 1.000 | .49 | 42.8/6.9/.0/21.6/28.7 |
| Externalizing problems | | | | | | |
| 1 | 95235.27 | 95273.25 | 95254.18 |  | 1.000 | 100.0 |
| 2 | 94022.89 | 94086.17 | 94054.40 | < .001 | .51 | 70.7/29.3 |
| 3 | 93636.30 | 93724.90 | 93680.41 | < .001 | .57 | 34.6/19.3/46.1 |
| 4 | 93529.81 | 93643.72 | 93586.53 | < .001 | .61 | 6.1/35.6/30.1/28.2 |
| 5 | 93511.37 | 93650.60 | 93580.70 | < .001 | .62 | 36.5/2.8/30.4/8.8/21.5 |

*Note.* AIC = the Akaike Information Criterion; BIC = Bayesian Information Criterion; SABIC = Sample-Size Adjusted BIC; LMR-LRT = Lo-Mendell-Rubin Likelihood Ratio Test.
